# Supplementary material for: First principles study of thermoelectric performance in pristine and binary alloyed monolayers of noble metals
Source: Royal Society of Chemistry journal article supplement (doi:10.1039/d2cp01831d), 2022-01-01
Supplement: d2cp01831d1.pdf [file d2cp01831d1.pdf]

## **Electronic Supplementary Information**

# **First Principles Study of Thermoelectric Performance in Pristine and Binary Alloyed Monolayers of Noble Metals**

**Table S1** DZP basis parameters optimized for bulk fcc structure, where  $V_{soft}$  and  $r_i$  are parameters for soft-confining potential. Cut-off radii for first and second zeta (radial part of wavefunction) are controlled by  $E_{shift}$  and split norm respectively.

| Element | $V_{soft}$ (in Ry) | Soft inner radii $r_i$ | Energy Shift<br>$E_{shift}$ (in meV) | Split norm<br>for $l = 0$ | Split norm<br>for $l = 1$ |
|---------|--------------------|------------------------|--------------------------------------|---------------------------|---------------------------|
| Au      | 86.15              | 0.78                   | 19.64                                | 0.15                      | 0.40                      |
| Ag      | 88.69              | 0.95                   | 20                                   | 0.29                      | 0.33                      |
| Cu      | 191                | 0.99                   | 20                                   | 0.35                      | 0.29                      |
| Pt      | 20                 | 0.95                   | 20                                   | 0.15                      | 0.40                      |

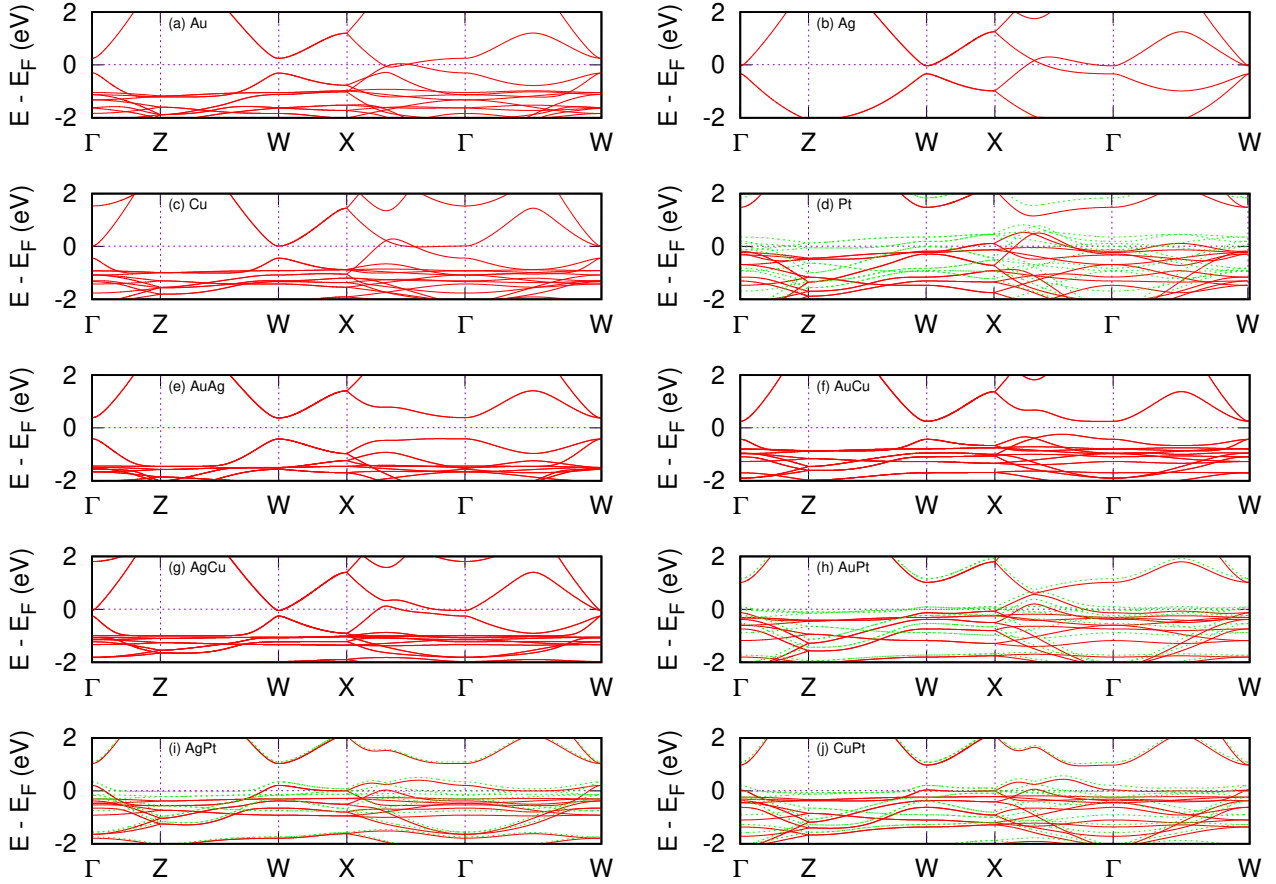

**Figure S1** Electronic band structures of considered monolayers for (a-d) pristine monolayers, (e-g) non-magnetic alloyed monolayers, and (h-j) magnetic alloyed monolayers. In figures for pristine Pt and magnetic alloys, solid red lines represent bands for  $\uparrow$ -spin and dotted green lines for  $\downarrow$ -spin states.

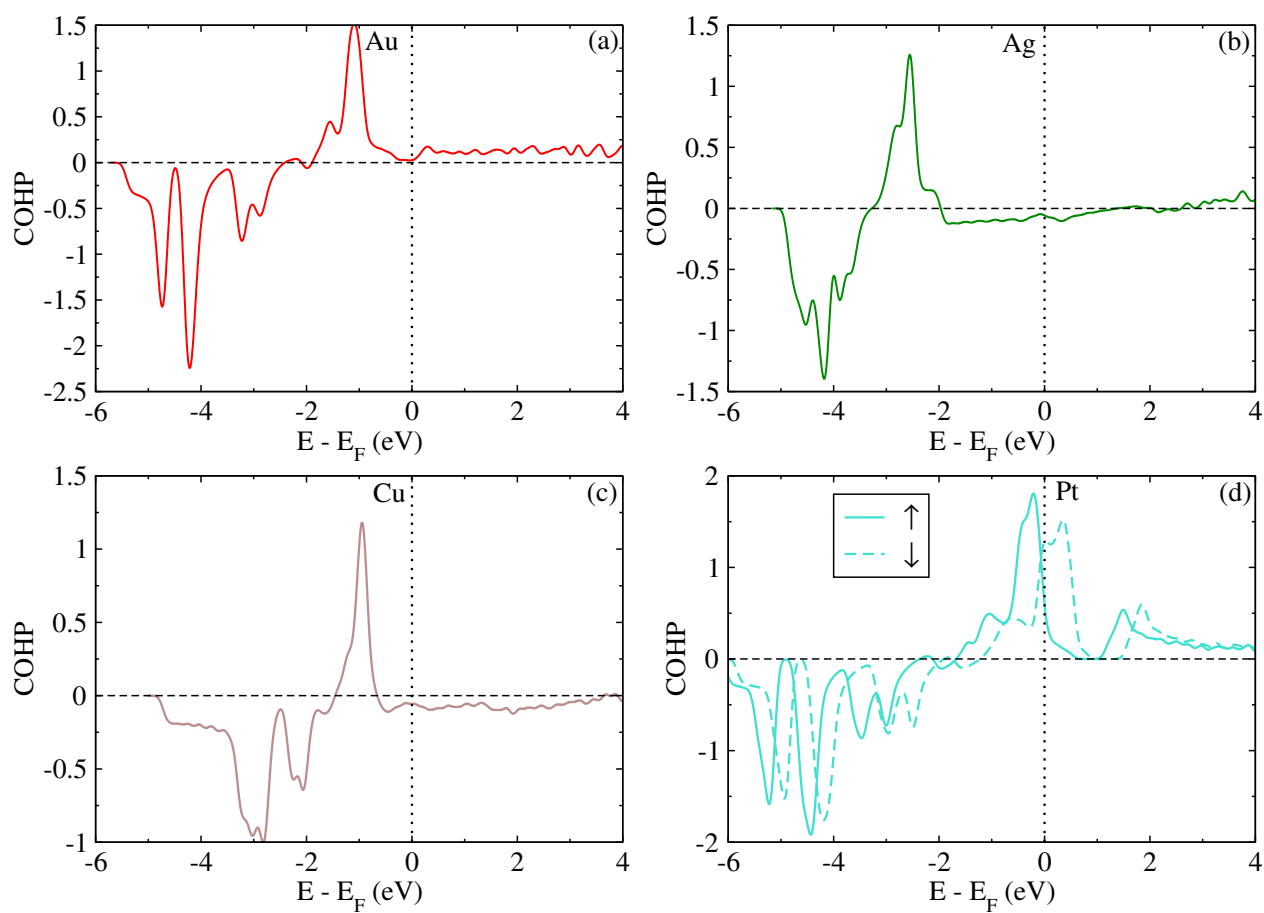

**Figure S2** Crystal orbital hamiltonian population (COHP) curves for pristine monolayers.

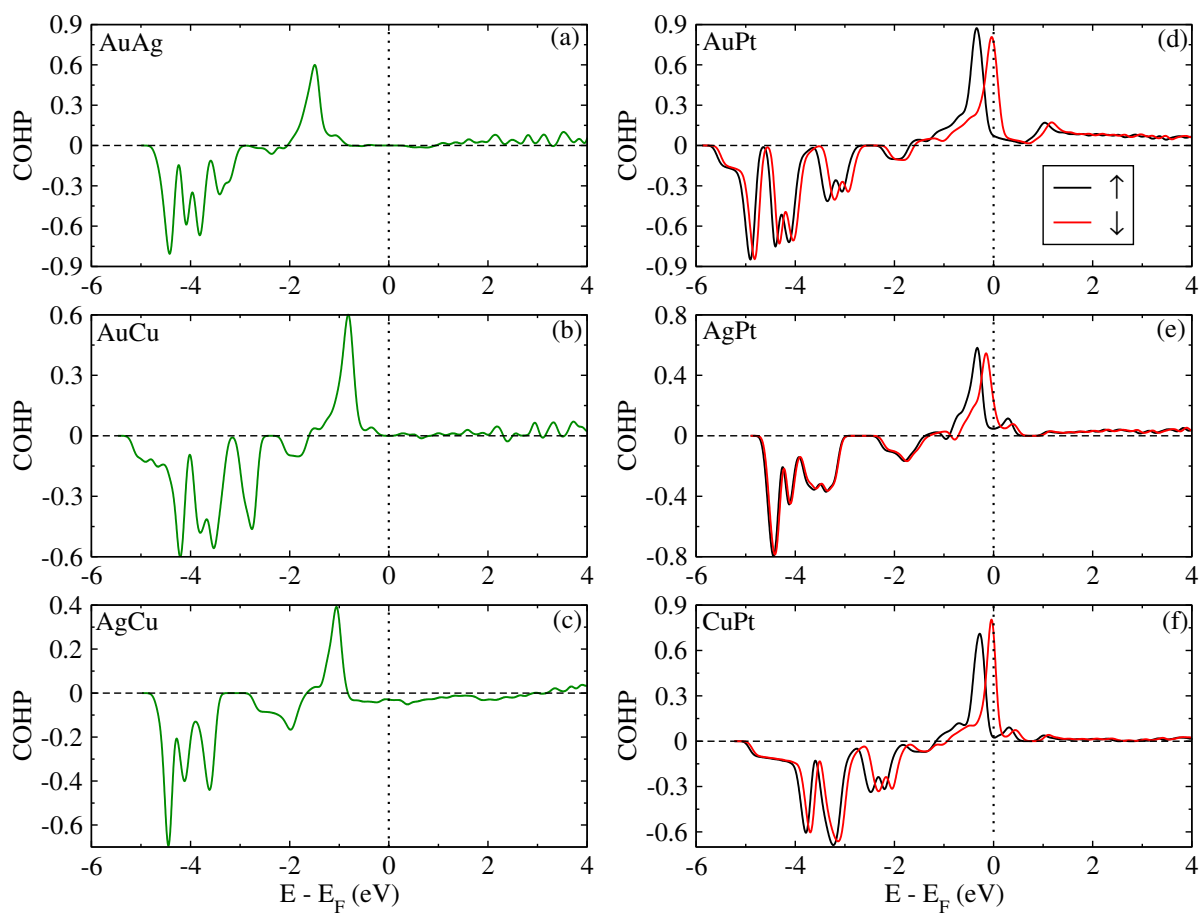

**Figure S3** Same as in S2 for alloyed monolayers.

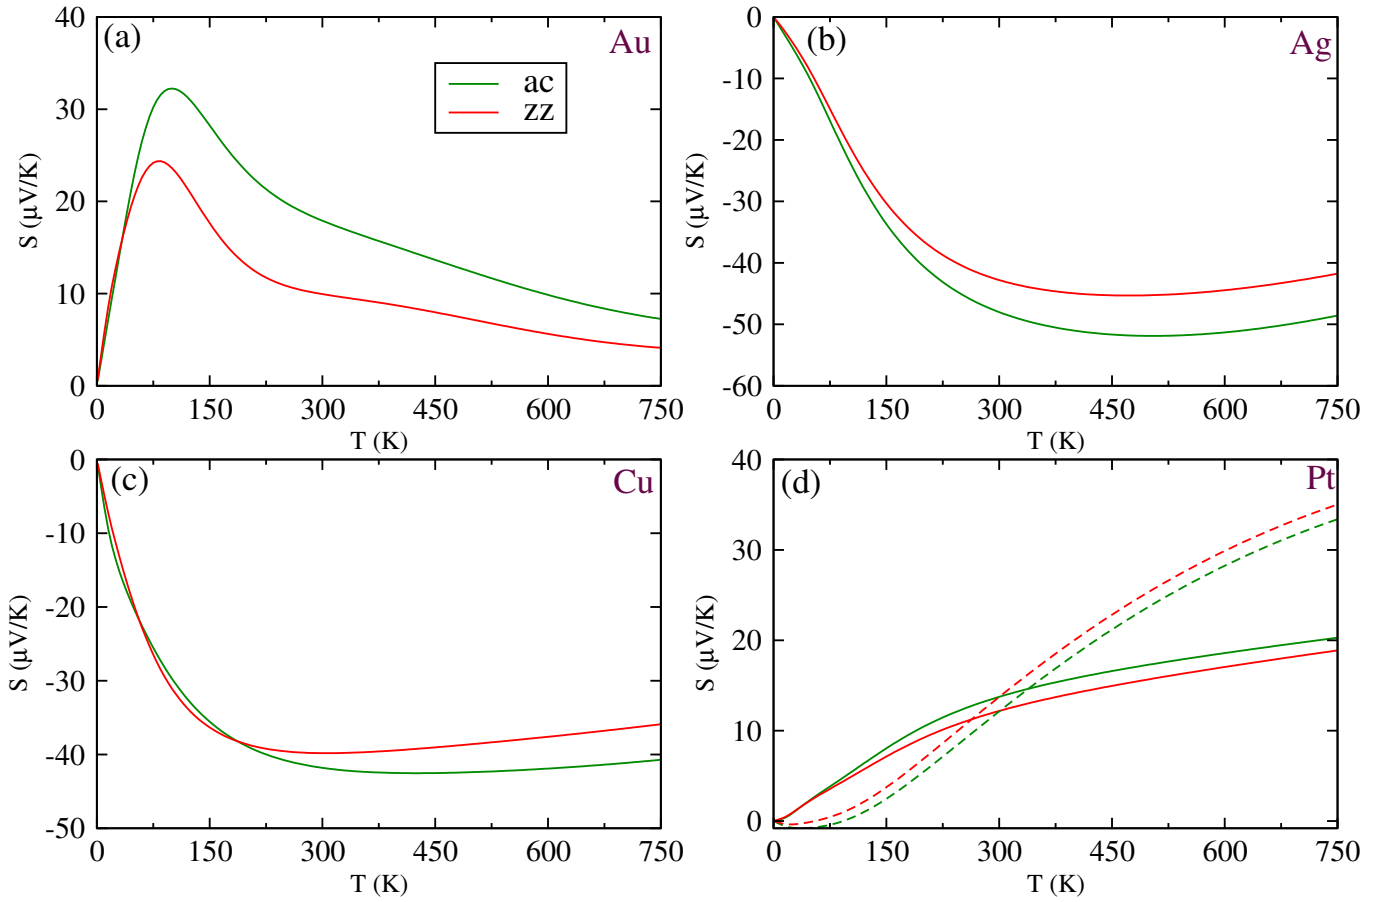

**Figure S4** Temperature dependence of Seebeck-coefficient  $S$  under zero bias for pristine monolayers. Dashed lines in (d) represent the spin-Seebeck co-efficient for Pt monolayer.

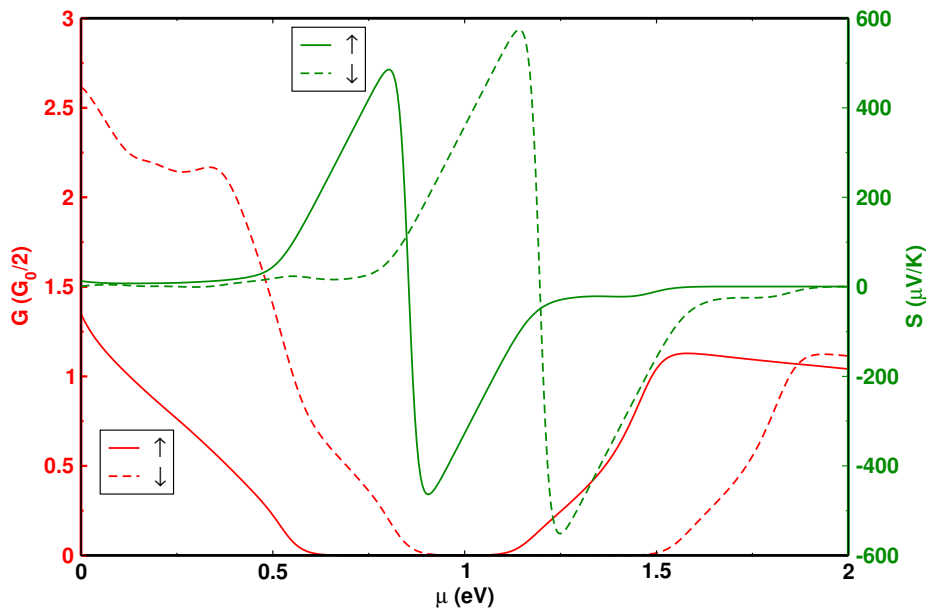

**Figure S5** Tuning of spin-resolved  $G$  and  $S$  with chemical potential  $\mu$  for Pt monolayer at room-temperature.

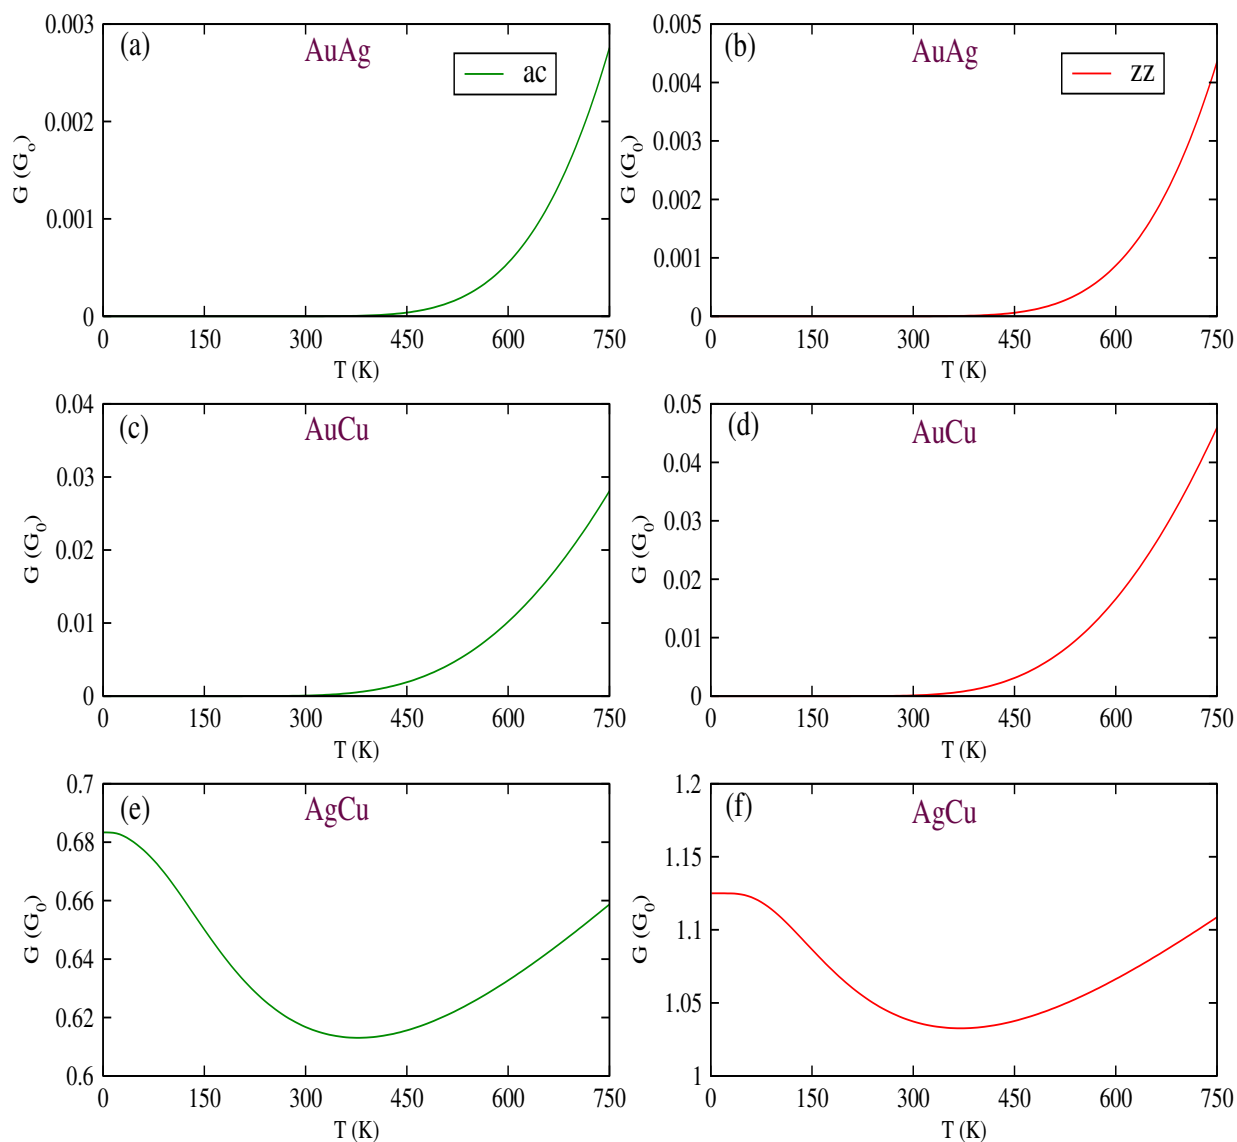

**Figure S6** Calculated electrical conductance  $G$  as a function of temperature for AuAg, AuCu, and AgCu monolayers along the ac (zz) direction in left (right) column.

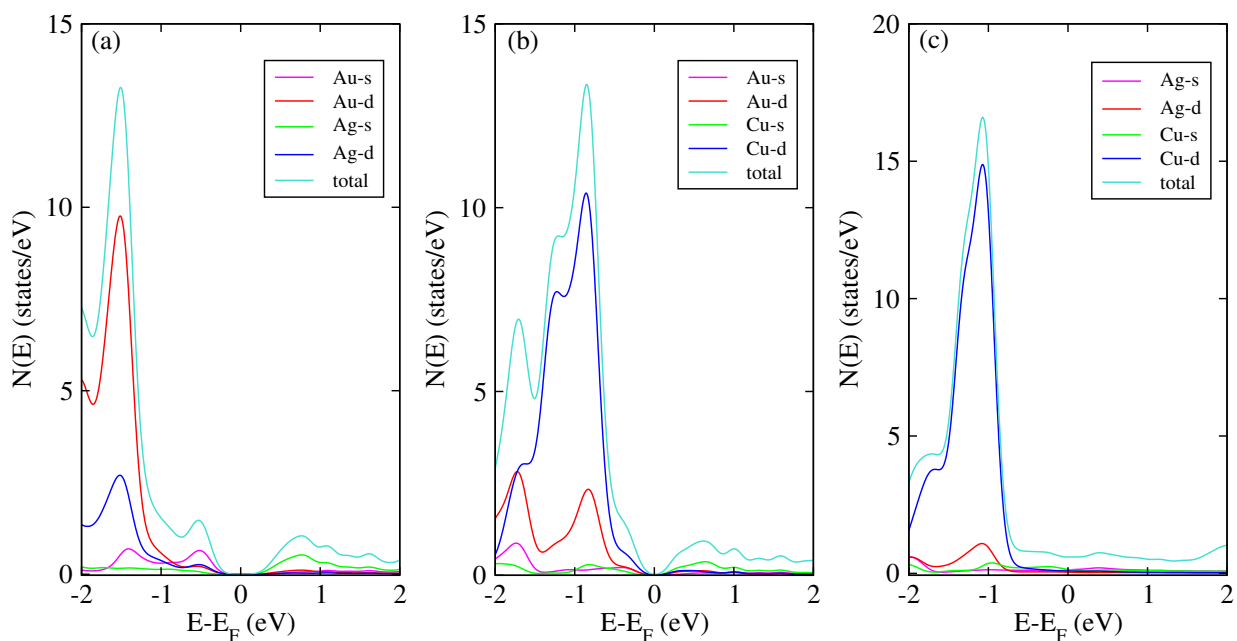

**Figure S7** Orbital-resolved and total density of states for (a) AuAg, (b) AuCu, and (c) AgCu monolayers.

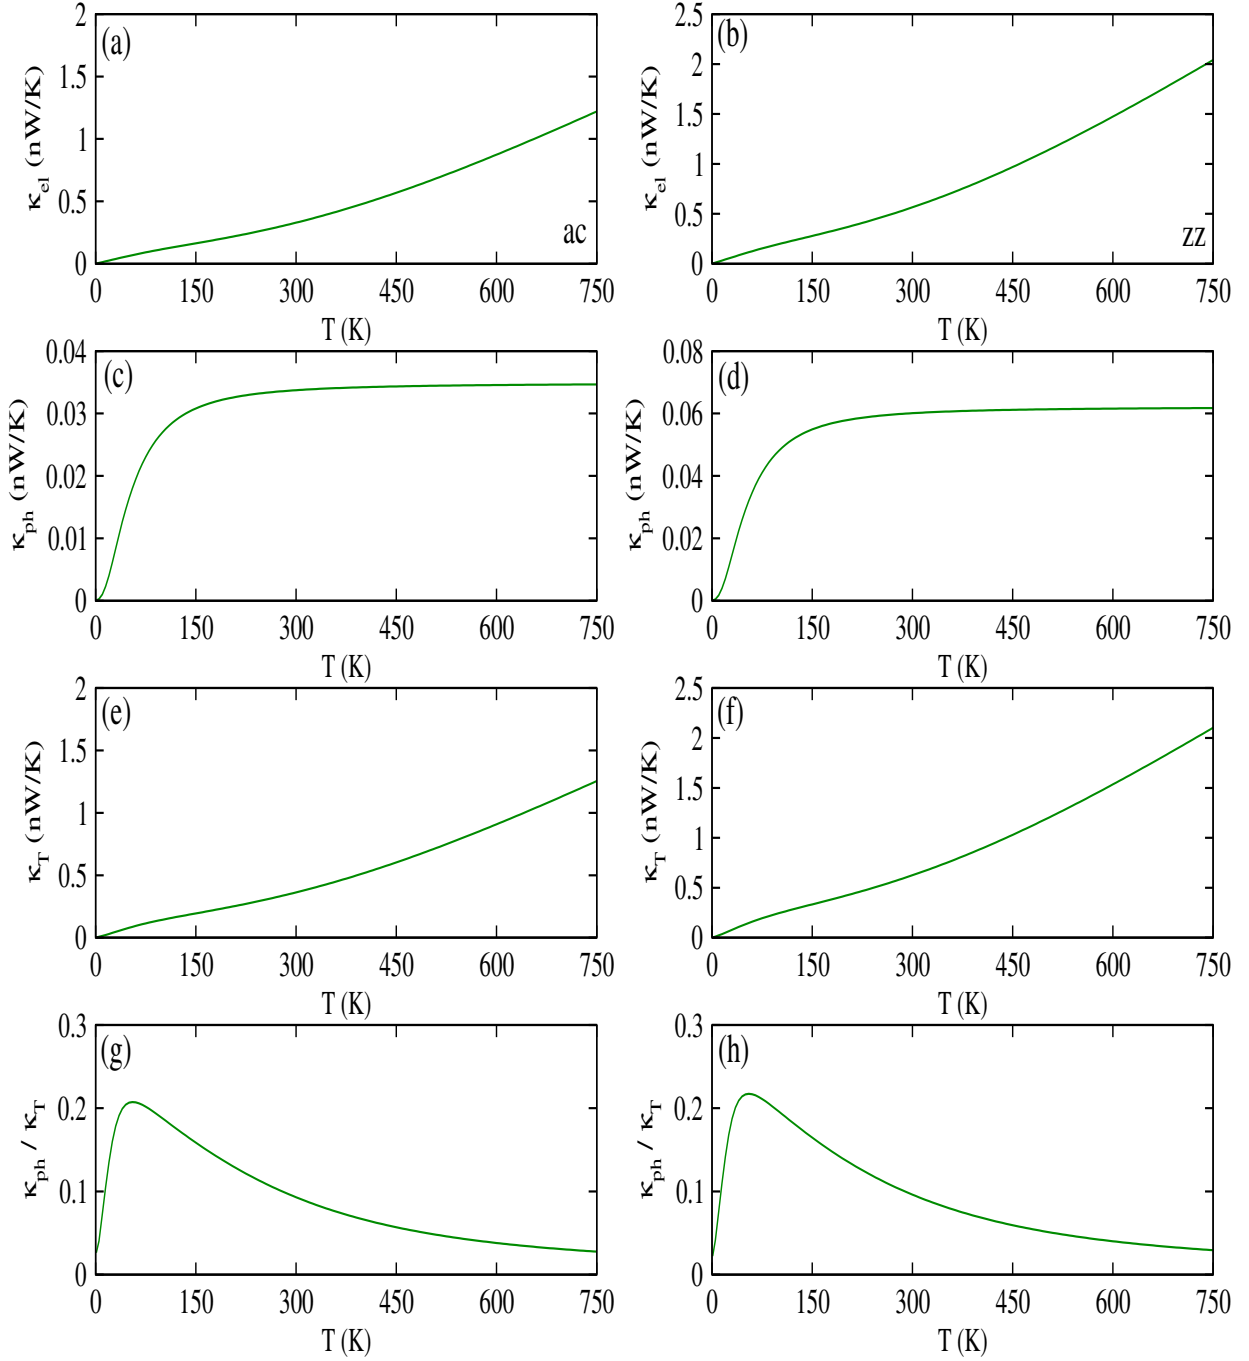

**Figure S8** Variation of  $\kappa_{el}$ ,  $\kappa_{ph}$ ,  $\kappa_T$ , and  $\kappa_{ph}/\kappa_T$  with temperature for  $\mu = 0$  in AgCu monolayer along ac (zz) direction in left (right) column.

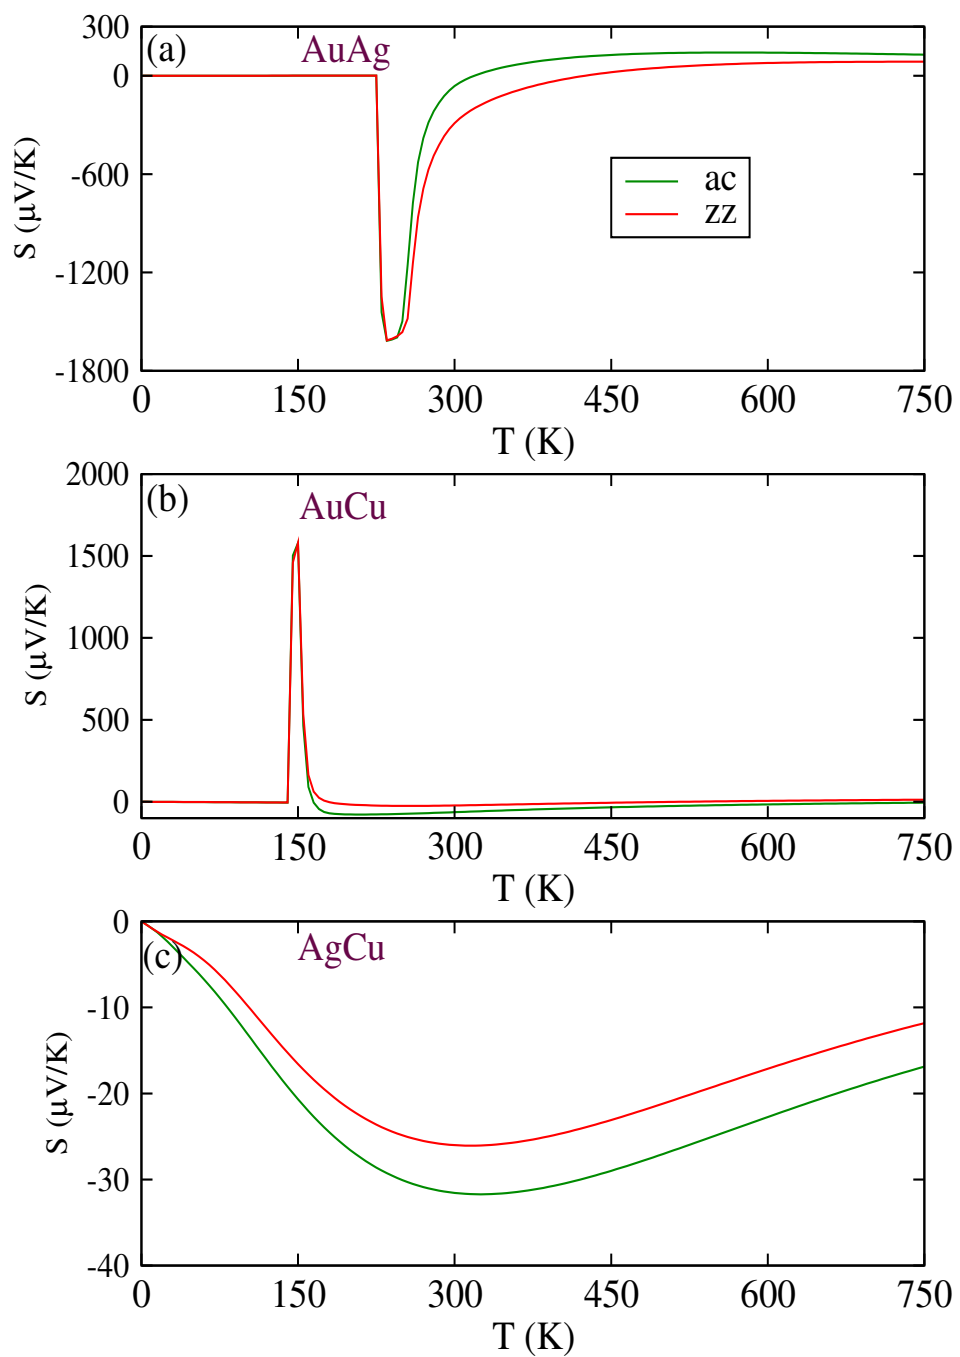

**Figure S9** Same as in S4 for non-magnetic alloyed monolayers.



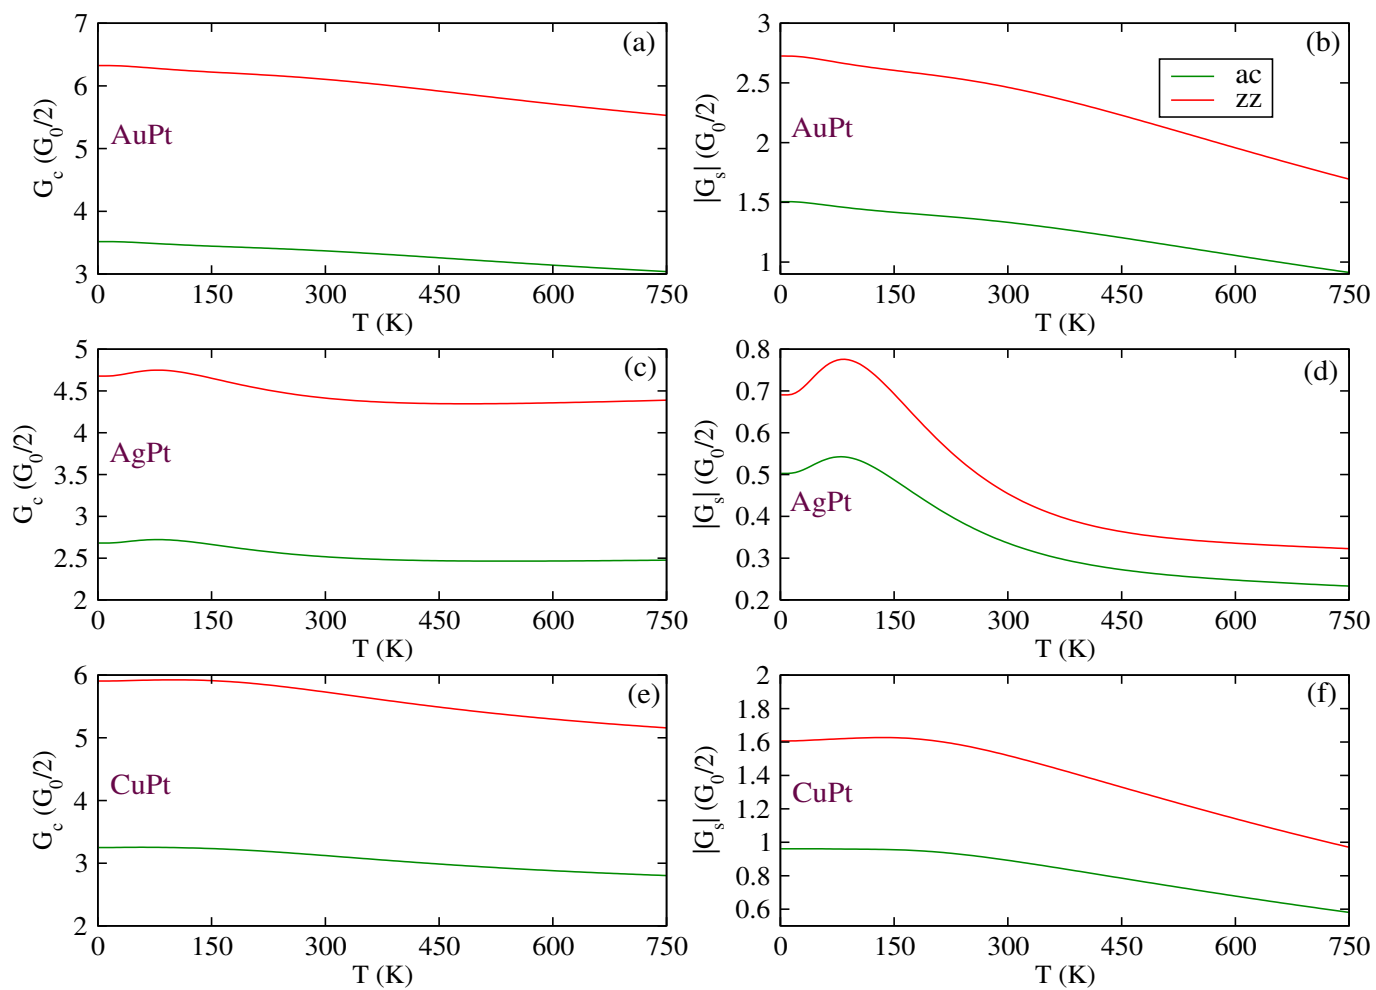

**Figure S10** Temperature dependence of charge  $G_c$  and spin  $|G_s|$  electrical conductance along ac and zz directions for (a-b) AuPt, (c-d) AgPt, and (e-f) CuPt alloyed monolayers.

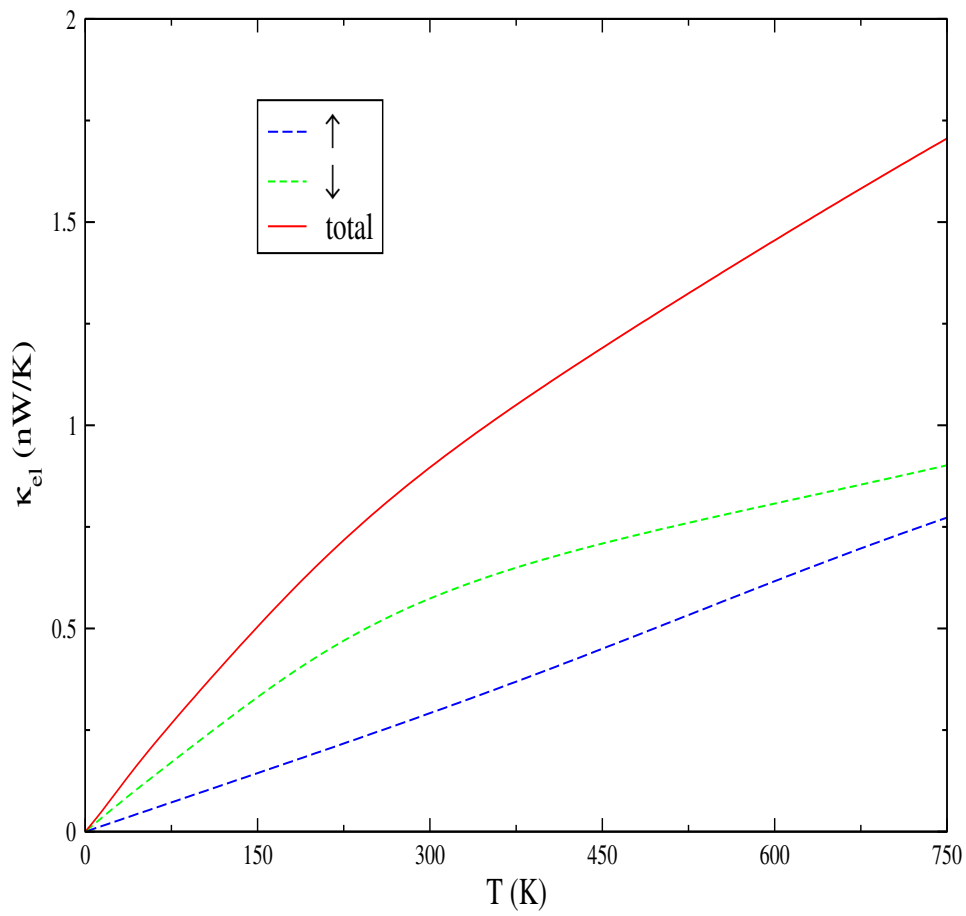

**Figure S11** Temperature dependence of total  $\kappa_{el}$  and spin-resolved  $\kappa_{el,\sigma}$  electronic thermal conductance in AuPt monolayer for transport in ac-direction.

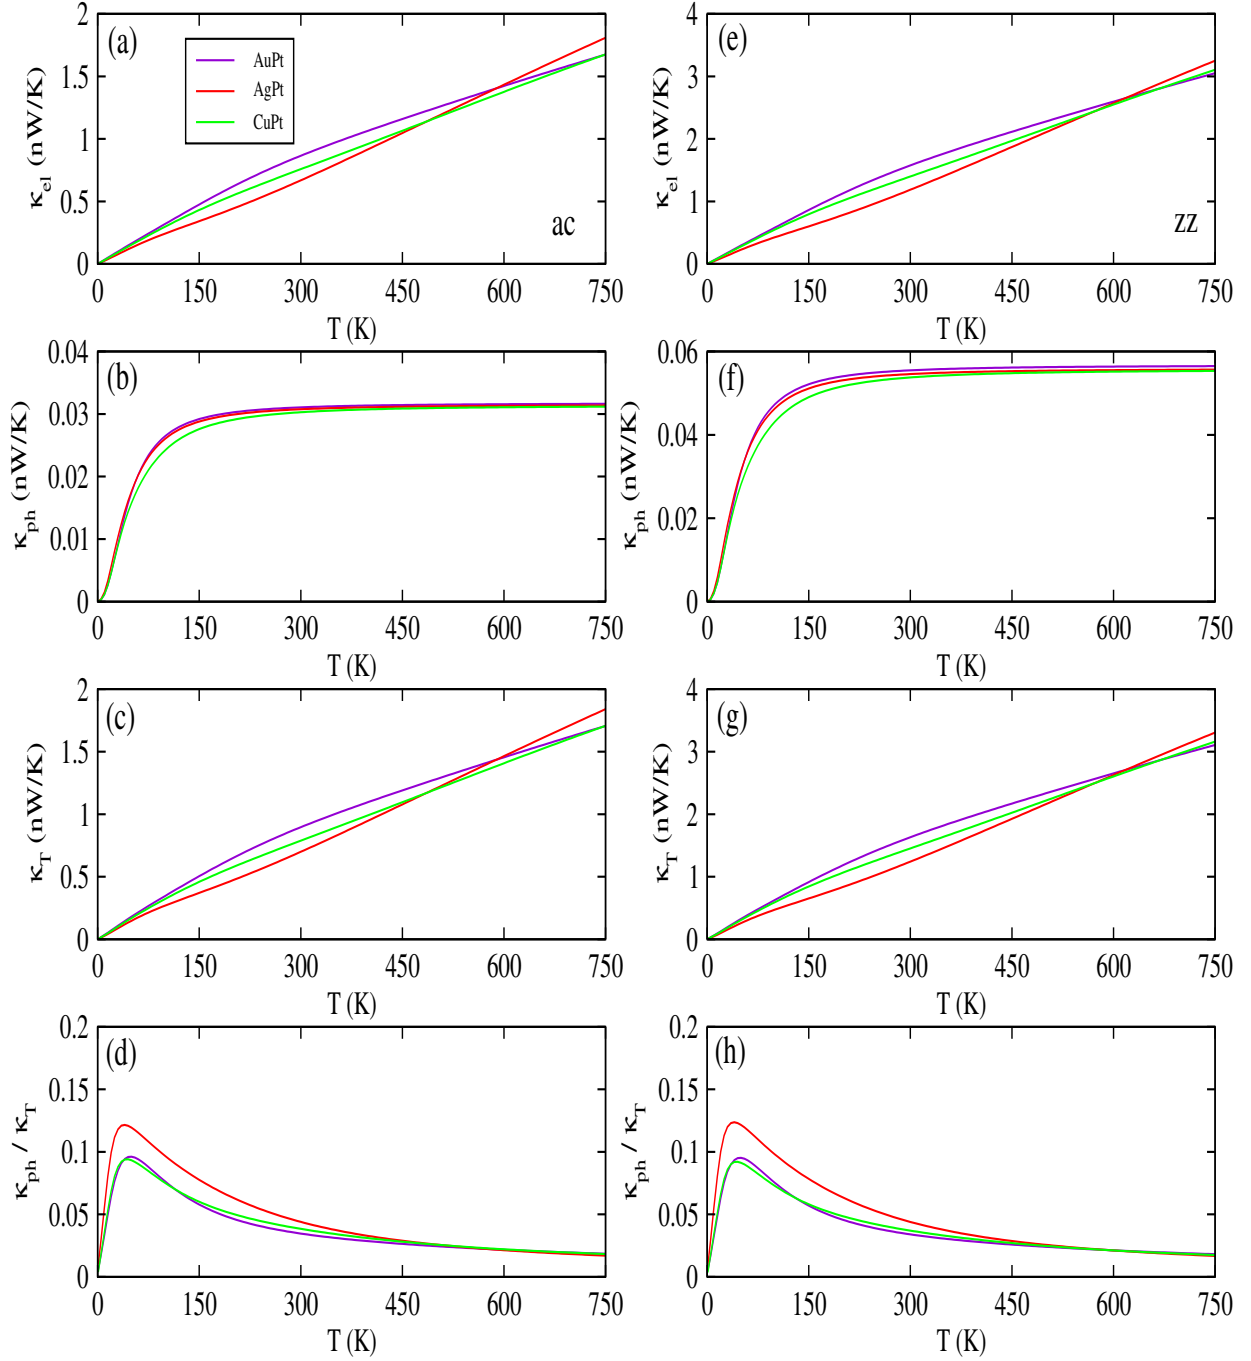

**Figure S12** Different thermal transport coefficients:  $\kappa_{el}$ ,  $\kappa_{ph}$ ,  $\kappa_T$ , and  $\kappa_{ph}/\kappa_T$  plotted as a function of  $T$  in AuPt, AgPt, and CuPt monolayers along ac (a-d) and zz (e-h) directions.

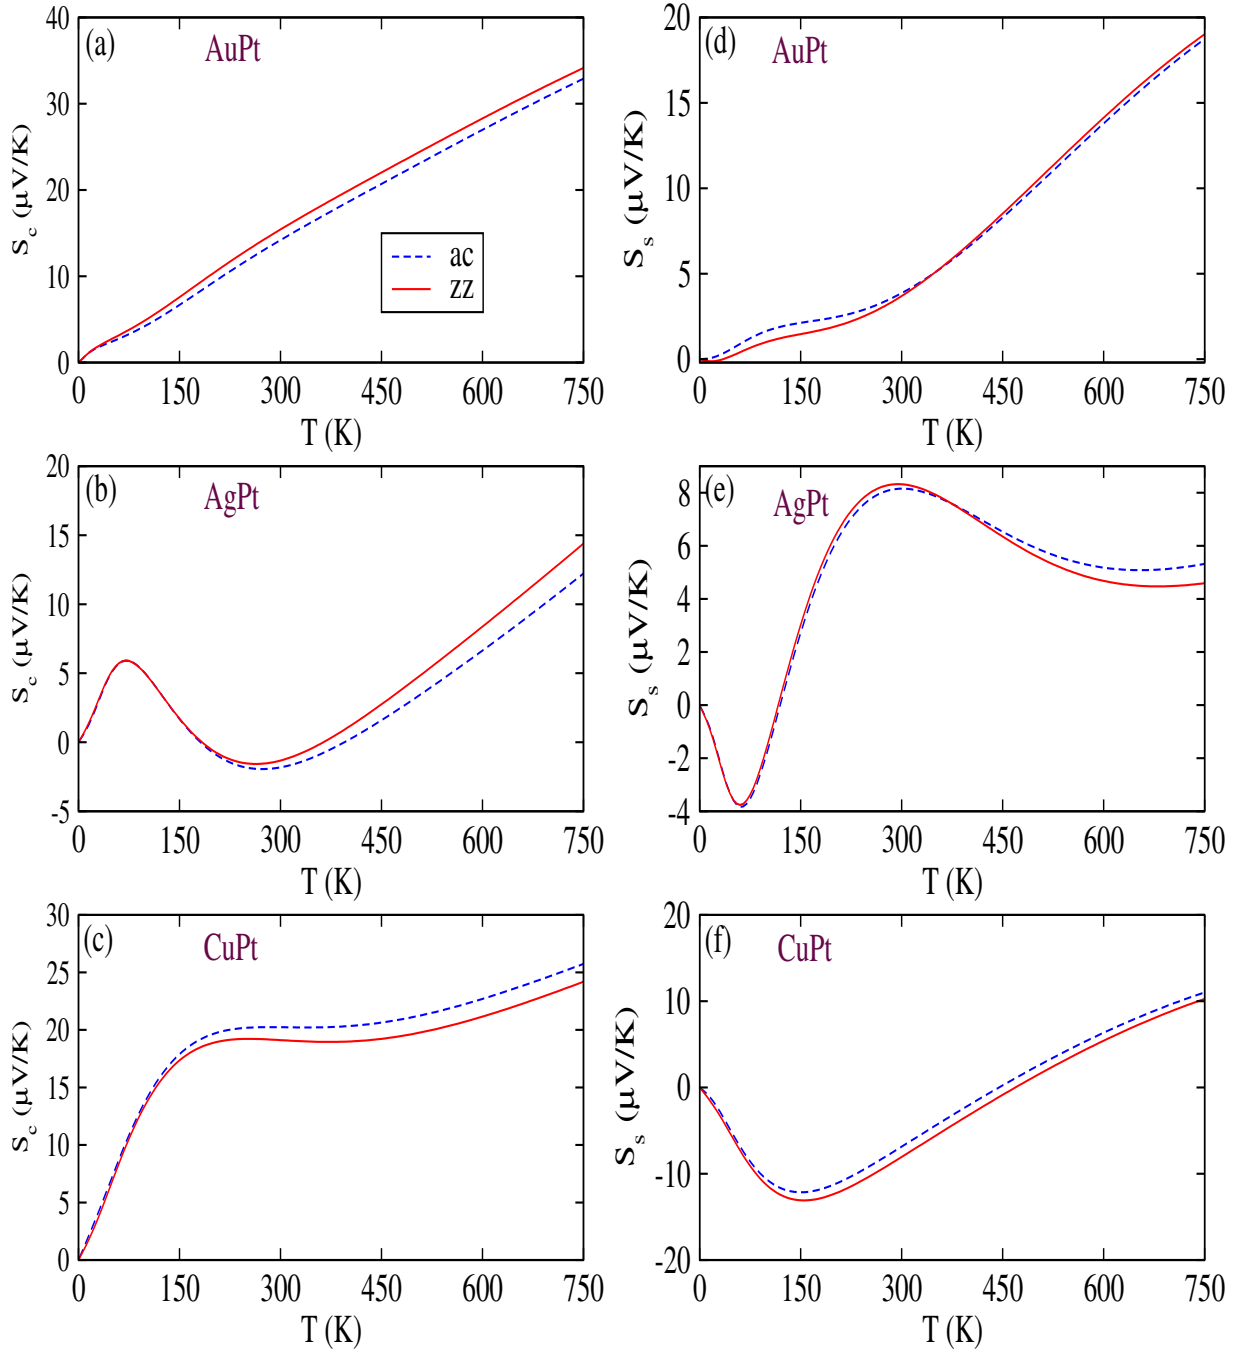

**Figure S13** Variation of  $S_c$  (a-c) and  $S_s$  (d-f) under zero bias for magnetic alloyed monolayers.
